# Supplementary material for: High-performance Zn-ion batteries constructed byin situconversion of surface-oxidized vanadium nitride into Zn3(OH)2V2O7·2H2O with oxygen defects
Source: Royal Society of Chemistry journal article supplement (doi:10.1039/d2ce01241c), 2022-12-05
Supplement: d2ce01241c1.pdf [file d2ce01241c1.pdf]

## Supporting Information

### High-performance Zn-ion batteries constructed by in situ conversion of surface-oxidized vanadium nitride into $\text{Zn}_3(\text{OH})_2\text{V}_2\text{O}_7 \cdot 2\text{H}_2\text{O}$ with oxygen defects

Di Li, Ningze Gao, Rui Sheng, Feng Li, Lei Wang, Yuanxiang Gu\* and Yanhui Sun  
*College of Environment and Safety Engineering, Qingdao University of Science and Technology, Qingdao 266042, China. E-mail: gyx0524@126.com*

\* Corresponding Authors, E-mail: gyx0524@126.com

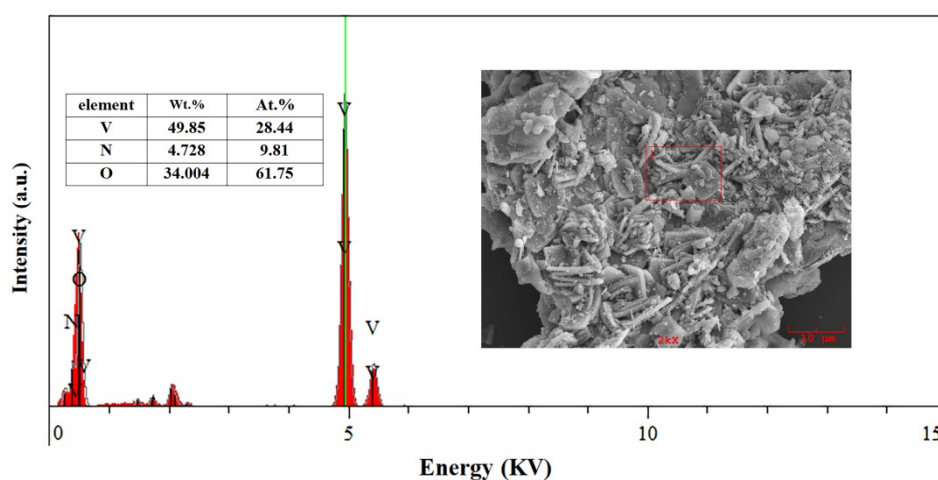

Fig. S1 EDS spectroscopy of O-VN.

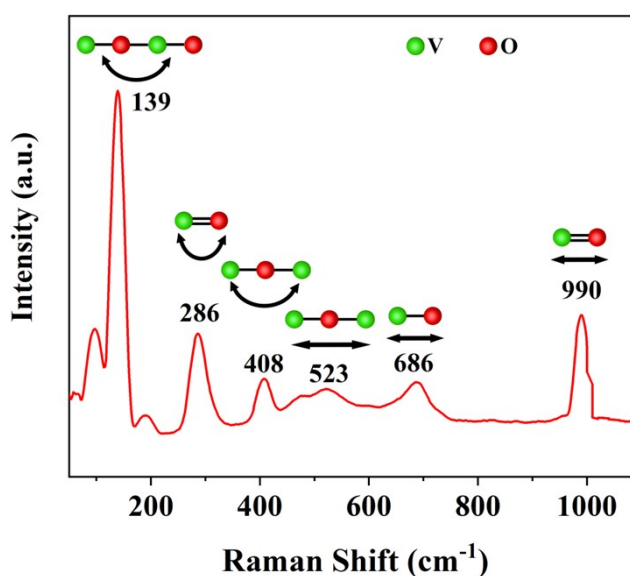

Fig. S2 Raman spectrum of the O-VN nanoparticles.

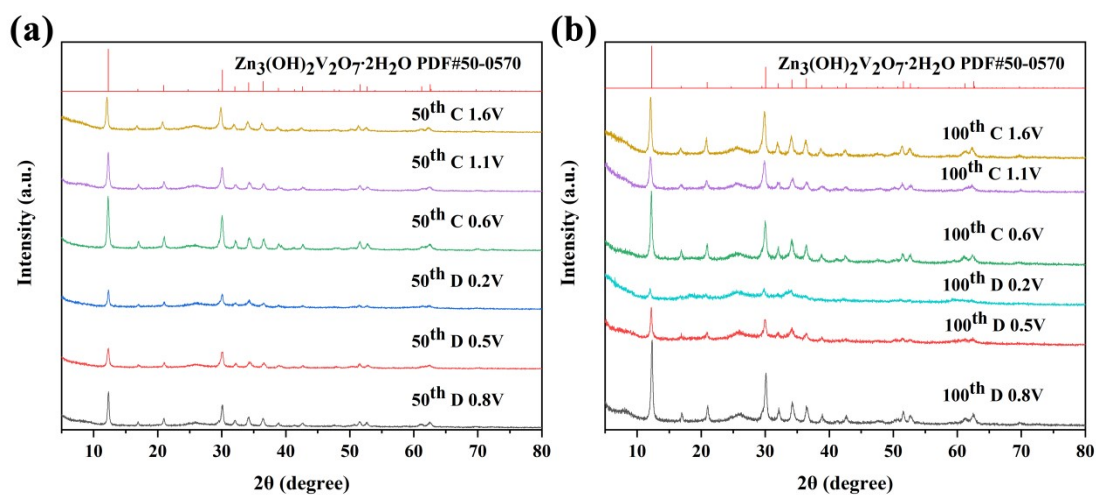

**Fig. S3** The XRD patterns of the O-VN electrode at various states in the (a) 50<sup>th</sup> and (b) 100<sup>th</sup> cycles.

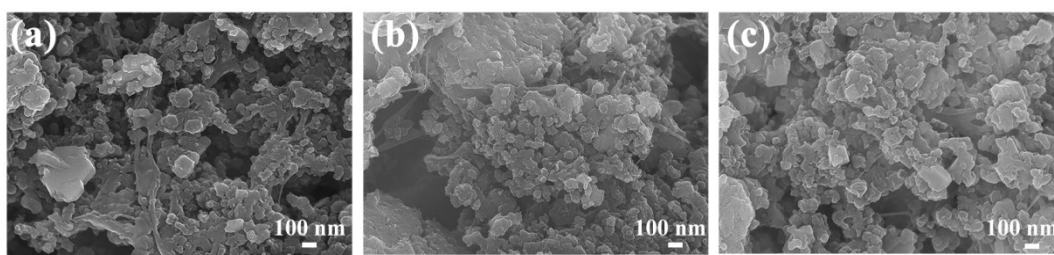

**Fig. S4** The SEM images of O-VN after (a) 1<sup>st</sup>, (b) 2<sup>nd</sup>, (c) 100<sup>th</sup> cycles.

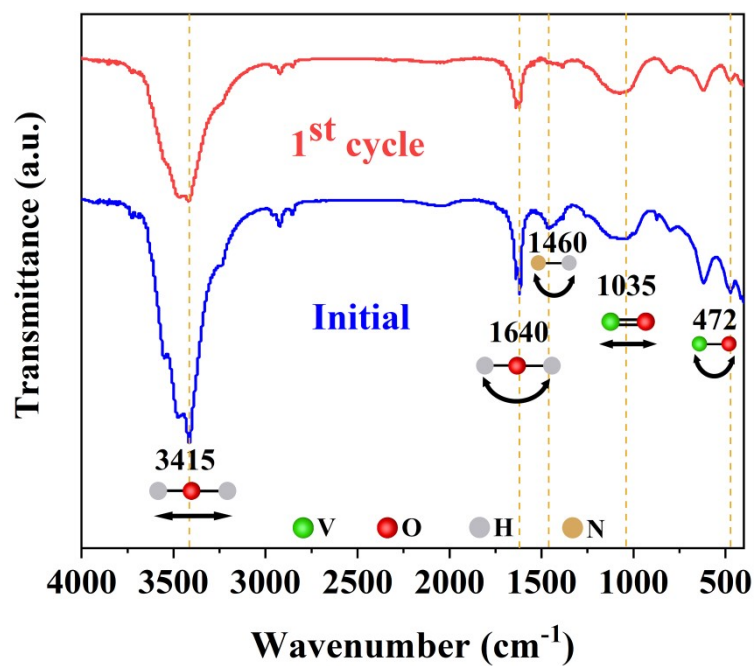

**Fig. S5** The IR spectra of the O-VN electrode material before cycling and after

different cycles.

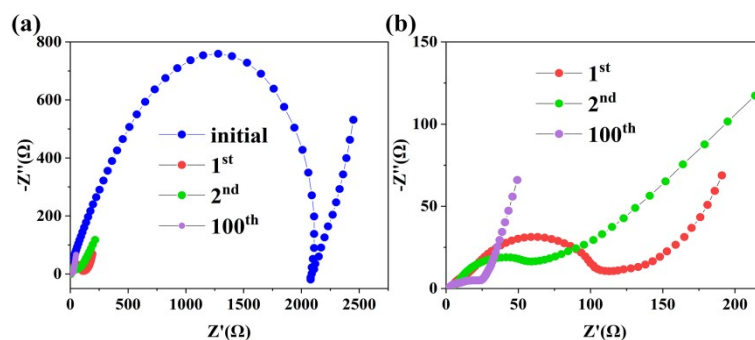

**Fig. S6** Nyquist plots of the O-VN electrode material before cycling and after different cycles.

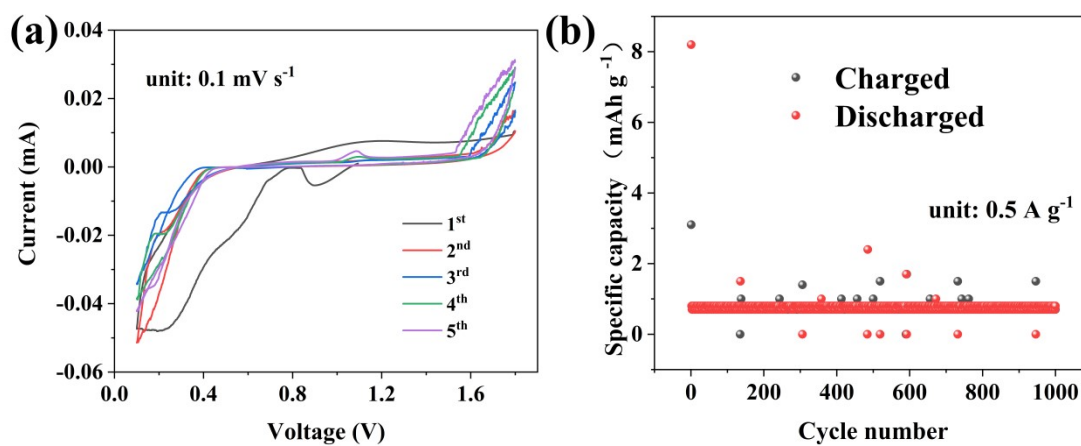

**Fig. S7** CV curves (a) and cycle performance curve (b) of O-VN electrode material at a current density of  $0.1 \text{ A g}^{-1}$  using  $0.5\text{M Zn}(\text{CF}_3\text{SO}_3)_2$  solution as electrolyte prepared with isopropanol as solvent.
